# Supplementary material for: Tobacco consumption behavior change during the COVID-19 pandemic is associated with perceived COVID threat
Source: PubMed Central journal article supplement (PMC10350210; doi:10.21203/rs.3.rs-3143401/v1), 2023-07-06
Supplement: NIHPPrs3143401v1-supplement-1.pdf [file NIHPPrs3143401v1-supplement-1.pdf]

## Supplemental Appendix Tables

Supplemental Table 1. Change in smoked tobacco use based on perceived threat of COVID with inverse probability weighting for complete responses

| <b>N = 113</b>                                      | <b>Model 1</b>            |         | <b>Model 2</b>            |         | <b>Model 3</b>            |         | <b>Model 4</b>            |         | <b>Model 5</b>            |         |
|-----------------------------------------------------|---------------------------|---------|---------------------------|---------|---------------------------|---------|---------------------------|---------|---------------------------|---------|
| Smoking Change                                      | Relative Risk<br>(95% CI) | P-value | Relative Risk<br>(95% CI) | P-value | Relative Risk<br>(95% CI) | P-value | Relative Risk<br>(95% CI) | P-value | Relative Risk<br>(95% CI) | P-value |
| COVID Threat Scale Score (per SD change above mean) |                           |         |                           |         |                           |         |                           |         |                           |         |
| <i>More v No Change</i>                             | 1.97<br>(1.03, 3.75)      | 0.04    | 1.97<br>(1.03, 3.74)      | 0.04    | 1.78<br>(0.91, 3.47)      | 0.09    | 1.70<br>(0.89, 3.23)      | 0.108   | 1.97<br>(1.03, 3.74)      | 0.93    |
| <i>Less v No Change</i>                             | 1.78<br>(0.93, 3.40)      | 0.08    | 1.78<br>(0.93, 3.41)      | 0.08    | 1.62<br>(0.84, 3.1)       | 0.15    | 1.69<br>(0.88, 3.24)      | 0.114   | 1.78<br>(0.93, 3.41)      | 0.08    |
| Age (per year change)                               |                           |         |                           |         |                           |         |                           |         |                           |         |
| <i>More v No Change</i>                             |                           |         | 1.00<br>(0.96, 1.04)      | 0.90    | 1.02<br>(0.97, 1.06)      | 0.46    | 1.01<br>(0.97, 1.06)      | 0.55    | 1.00<br>(0.96, 1.04)      | 0.90    |
| <i>Less v No Change</i>                             |                           |         | 0.99<br>(0.95, 1.04)      | 0.73    | 1.01<br>(0.96, 1.05)      | 0.76    | 1.00<br>(0.96, 1.05)      | 0.98    | 0.99<br>(0.95, 1.04)      | 0.73    |
| PHQ-2 Score (per point change)                      |                           |         |                           |         |                           |         |                           |         |                           |         |
| <i>More v No Change</i>                             |                           |         |                           |         | 1.67<br>(0.98, 2.82)      | 0.057   |                           |         |                           |         |
| <i>Less v No Change</i>                             |                           |         |                           |         | 1.25<br>(0.72, 2.18)      | 0.422   |                           |         |                           |         |
| GAD-2 Score (per point change)                      |                           |         |                           |         |                           |         |                           |         |                           |         |
| <i>More v No Change</i>                             |                           |         |                           |         |                           |         | 1.56<br>(0.93, 2.63)      | 0.09    |                           |         |
| <i>Less v No Change</i>                             |                           |         |                           |         |                           |         | 1.32<br>(0.75, 2.34)      | 0.34    |                           |         |

| N = 113                         | Model 1 | Model 2 | Model 3 | Model 4 | Model 5                       |
|---------------------------------|---------|---------|---------|---------|-------------------------------|
| Anxiety or depression indicator |         |         |         |         |                               |
| <i>More v No Change</i>         |         |         |         |         | 2.75<br>(0.70, 10.79)<br>0.15 |
| <i>Less v No Change</i>         |         |         |         |         | 0.56<br>(0.16, 2.00)<br>0.37  |

**Supplemental Table 2: Change in vaping behavior based on perceived threat of COVID with inverse probability weighting for complete responses**

| <b>N = 87</b>                                       | <b>Model 1</b>                          |                | <b>Model 2</b>                          |                | <b>Model 3</b>                          |                | <b>Model 4</b>                          |                | <b>Model 5</b>                          |                |
|-----------------------------------------------------|-----------------------------------------|----------------|-----------------------------------------|----------------|-----------------------------------------|----------------|-----------------------------------------|----------------|-----------------------------------------|----------------|
| Vaping Change                                       | <b>Relative Risk</b><br><b>(95% CI)</b> | <b>P-value</b> | <b>Relative Risk</b><br><b>(95% CI)</b> | <b>P-value</b> | <b>Relative Risk</b><br><b>(95% CI)</b> | <b>P-value</b> | <b>Relative Risk</b><br><b>(95% CI)</b> | <b>P-value</b> | <b>Relative Risk</b><br><b>(95% CI)</b> | <b>P-value</b> |
| COVID Threat Scale Score (per SD change above mean) |                                         |                |                                         |                |                                         |                |                                         |                |                                         |                |
| <i>More v No Change</i>                             | 0.96<br>(0.38,2.41)                     | 0.93           | 0.95<br>(0.38, 2.42)                    | 0.92           | 0.84<br>(0.32, 2.16)                    | 0.71           | 0.83<br>(0.30, 2.25)                    | 0.71           | 0.95<br>(0.38, 2.42)                    | 0.92           |
| <i>Less v No Change</i>                             | 1.67<br>(0.65, 4.29)                    | 0.29           | 1.64<br>(0.64, 4.20)                    | 0.30           | 1.61<br>(0.57, 4.50)                    | 0.37           | 1.87<br>(0.69, 5.07)                    | 0.22           | 1.64<br>(0.64, 4.20)                    | 0.30           |
| Age (per year change)                               |                                         |                |                                         |                |                                         |                |                                         |                |                                         |                |
| <i>More v No Change</i>                             |                                         |                | 1.00<br>(0.94, 1.05)                    | 0.88           | 1.00<br>(0.94, 1.07)                    | 0.91           | 1.00<br>(0.95, 1.06)                    | 0.94           | 1.00<br>(0.94, 1.05)                    | 0.88           |
| <i>Less v No Change</i>                             |                                         |                | 1.01<br>(0.96, 1.06)                    | 0.64           | 0.99<br>(0.94, 1.05)                    | 0.84           | 1.01<br>(0.96, 1.06)                    | 0.77           | 1.01<br>(0.96, 1.06)                    | 0.64           |
| PHQ-2 Score (per point change)                      |                                         |                |                                         |                |                                         |                |                                         |                |                                         |                |
| <i>More v No Change</i>                             |                                         |                |                                         |                | 0.98<br>(0.54, 1.78)                    | 0.95           |                                         |                |                                         |                |
| <i>Less v No Change</i>                             |                                         |                |                                         |                | 0.82<br>(0.46, 1.44)                    | 0.48           |                                         |                |                                         |                |
| GAD-2 Score (per point change)                      |                                         |                |                                         |                |                                         |                |                                         |                |                                         |                |
| <i>More v No Change</i>                             |                                         |                |                                         |                |                                         |                | 1.41<br>(0.57, 3.50)                    | 0.46           |                                         |                |

| <b>N = 87</b>                   | <b>Model 1</b> | <b>Model 2</b> | <b>Model 3</b> | <b>Model 4</b>       | <b>Model 5</b>       |
|---------------------------------|----------------|----------------|----------------|----------------------|----------------------|
| <i>Less v No Change</i>         |                |                |                | 0.69<br>(0.32, 1.50) | 0.35                 |
| Anxiety or depression indicator |                |                |                |                      |                      |
| <i>More v No Change</i>         |                |                |                |                      | 1.65<br>(0.32, 8.38) |
| <i>Less v No Change</i>         |                |                |                |                      | 1.01<br>(0.25, 4.13) |
